# Supplementary material for: Elevated risk of invasive group A streptococcal disease and host genetic variation in the human leucocyte antigen locus
Source: PubMed Central journal article supplement (PMC7039814; doi:10.1038/s41435-019-0082-z), 2019-08-29
Supplement: 41435_2019_82_MOESM1_ESM.pdf [file 41435_2019_82_MOESM1_ESM.pdf]

**Supplementary Table 1: Quality Control of Genome-wide Genotyping Data**

| <b>Process</b> | <b>Step</b>                  | <b>Threshold for exclusion</b>                               | <b>Removed</b>         | <b>Carried Forward</b>    |
|----------------|------------------------------|--------------------------------------------------------------|------------------------|---------------------------|
| Individual QC  | Missingness                  | Missingness > 5%                                             | 1 case<br>7 controls   | 49 cases<br>2054 controls |
|                | Heterozygosity               | Outliers removed<br>(see Supplementary Figure 3)             | 2 cases<br>46 controls | 47 cases<br>2008 controls |
|                | Relatedness                  | Relatedness > 0.094                                          | 1 case<br>399 controls | 46 cases<br>1609 controls |
|                | Ancestry                     | Non-European outlier removed<br>(see Supplementary Figure 4) | 3 cases<br>69 controls | 43 cases<br>1540 controls |
| Variant QC     | Missingness                  | Missingness > 0.01                                           | 73 variants            | 119251 variants           |
|                | Frequency                    | Minor allele frequency < 0.05                                | 85 variants            | 119166 variants           |
|                | Hardy-Weinberg               | Hardy-Weinberg <i>P</i> -value < 10 <sup>-10</sup>           | 9 variants             | 119157 variants           |
|                | Two Locus Test <sup>32</sup> | Outlier removed<br>(see Supplementary Figure 5)              | 23 variants            | 119134 variants           |

**Supplementary Table 2: Association statistics for imputed HLA alleles associated with susceptibility**

| <b>Allele</b>         | <b>MAF</b> | <b>Imputation R<sup>2*</sup></b> | <b>OR (95% CI)</b> | <b>P<sub>LMM</sub></b> |
|-----------------------|------------|----------------------------------|--------------------|------------------------|
| <i>HLA-DRB1*13:01</i> | 0.057      | 0.988                            | 2.19 (1.13-4.23)   | 0.020                  |
| <i>HLA-DQA1*01:03</i> | 0.061      | 0.991                            | 2.31 (1.23-4.36)   | 0.009                  |
| <i>HLA-DQB1*06:03</i> | 0.061      | 0.936                            | 2.25 (1.18-4.31)   | 0.014                  |

MAF, minor allele frequency; OR, odds ratio; CI, confidence intervals; LMM, linear mixed-model.

\*Beagle software<sup>34</sup> (v3.0.4) R<sup>2</sup> statistic

**Supplementary Table 3: Association statistics for imputed HLA amino acids associated with susceptibility**

| <b>Gene</b>     | <b>IMGT Position</b> | <b>Amino acid</b> | <b>Direction</b> | <b>MAF</b> | <b>Imputation R<sup>2</sup>*</b> | <b>OR (95% CI)</b>  | <b>P<sub>LMM</sub></b> |
|-----------------|----------------------|-------------------|------------------|------------|----------------------------------|---------------------|------------------------|
| <i>HLA-A</i>    | 9                    | Tyrosine          | Presence         | 0.150      | 0.994                            | 0.44<br>(0.20-0.96) | 0.041                  |
| <i>HLA-C</i>    | 35                   | Glutamine         | Presence         | 0.136      | 0.999                            | 1.86<br>(1.11-3.11) | 0.018                  |
| <i>HLA-C</i>    | 138                  | Lysine            | Presence         | 0.136      | 0.997                            | 1.85<br>(1.10-3.10) | 0.020                  |
| <i>HLA-C</i>    | 156                  | Leucine-Arginine  | Absence          | 0.234      | 0.995                            | 0.51<br>(0.27-0.94) | 0.031                  |
| <i>HLA-C</i>    | 275                  | Glycine           | Presence         | 0.136      | 0.996                            | 1.86<br>(1.11-3.11) | 0.018                  |
| <i>HLA-DQA1</i> | 41                   | Lysine            | Presence         | 0.061      | 0.990                            | 2.32<br>(1.23-4.37) | 0.009                  |
| <i>HLA-DQA1</i> | 130                  | Alanine           | Presence         | 0.061      | 0.990                            | 2.32<br>(1.23-4.36) | 0.009                  |
| <i>HLA-DPB1</i> | 84                   | Glycine           | Absence          | 0.315      | 0.976                            | 1.55<br>(1.01-2.38) | 0.043                  |
| <i>HLA-DPB1</i> | 205                  | Valine            | Absence          | 0.124      | 0.766                            | 2.01<br>(1.14-3.53) | 0.015                  |
| <i>HLA-DPB1</i> | 215                  | Isoleucine        | Absence          | 0.111      | 0.748                            | 1.97<br>(1.09-3.55) | 0.024                  |

IMGT, International Immunogenetics Information System; MAF, minor allele frequency; OR, odds ratio; CI, confidence intervals; LMM, linear mixed-model.

\*Beagle software<sup>34</sup> (v3.0.4) R<sup>2</sup> statistic

**Supplementary Table 4: Association statistics for imputed previously implicated HLA haplotypes**

| Haplotype                               | Direction*     | MAF    | Info† | OR (95% CI)      | $P_{LMM}$ |
|-----------------------------------------|----------------|--------|-------|------------------|-----------|
| <i>DRB1*15:01-DQA1*01:02-DQB1*06:02</i> | Protective     | 0.158  | 1.0   | 0.87 (0.47-1.64) | 0.67      |
| <i>DRB1*03:01-DQA1*05:01-DQB1*02:01</i> | Protective     | 0.142  | 1.0   | 0.97 (0.52-1.82) | 0.93      |
| <i>DRB1*14:01-DQA1*01:01-DQB1*05:03</i> | Predisposition | 0.0262 | 1.0   | 2.36 (0.94-5.91) | 0.067     |
| <i>DRB1*11:01-DQA1*05:01-DQB1*03:01</i> | Predisposition | 0.0753 | 1.0   | 0.79 (0.25-2.54) | 0.70      |
| <i>DRB1*07:01-DQA1*03:01-DQB1*02:01</i> | Predisposition | 0      | -     | -                | -         |

MAF, minor allele frequency; OR, odds ratio; CI, confidence intervals; LMM, linear mixed-model.

\*Reported in Kotb et al. 2002<sup>4</sup>

†SNPTEST software (v2.5.4) Info statistic

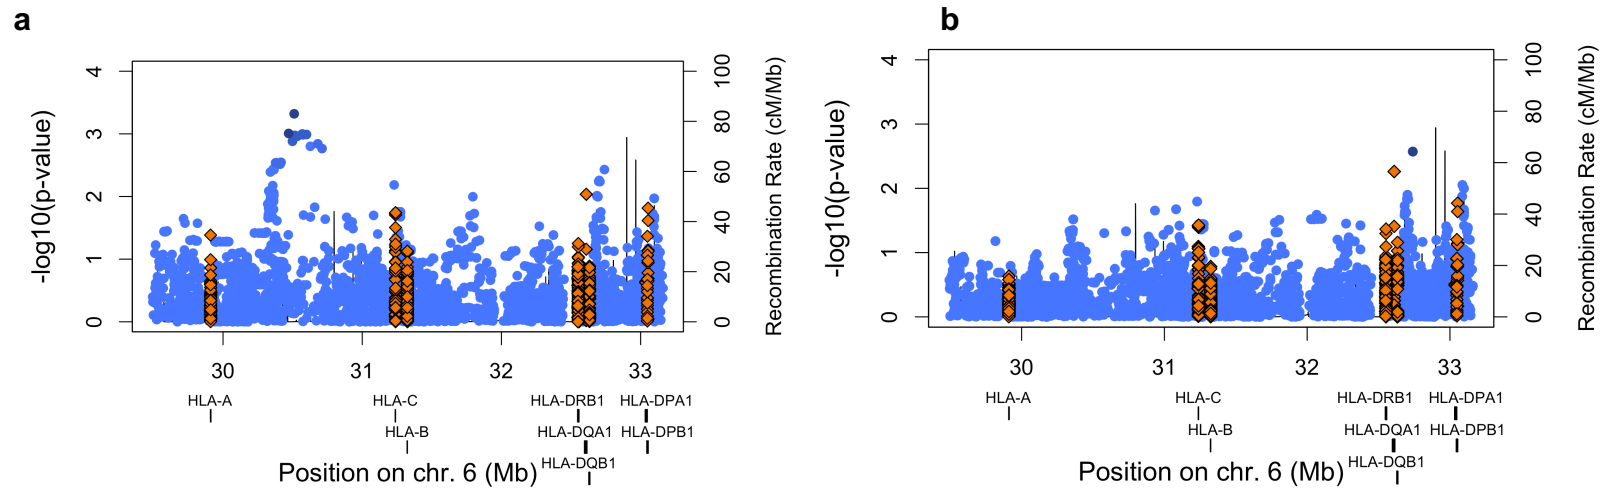

**Supplementary Figure 1: Association signals across the histocompatibility complex.** Regional association plots are shown with genomic position plotted against the negative common logarithm of the p-value from a linear mixed-model analysis **(a)** before and **(b)** after conditioning on rs2524222. Amino acids are indicated by gold-coloured diamonds while SNPs are indicated by blue circles with the depth of the blue proportional to the degree of linkage disequilibrium with the most associated variant. The recombination rate is shown as a line plotted on the right-hand y-axis.

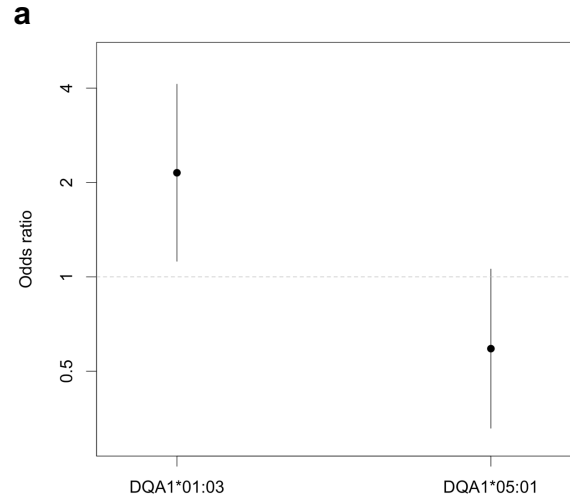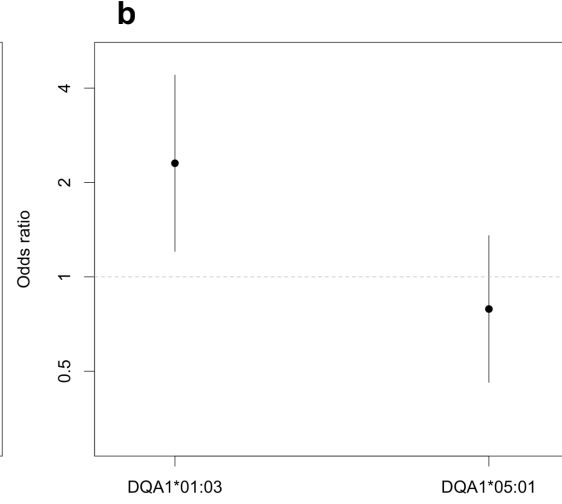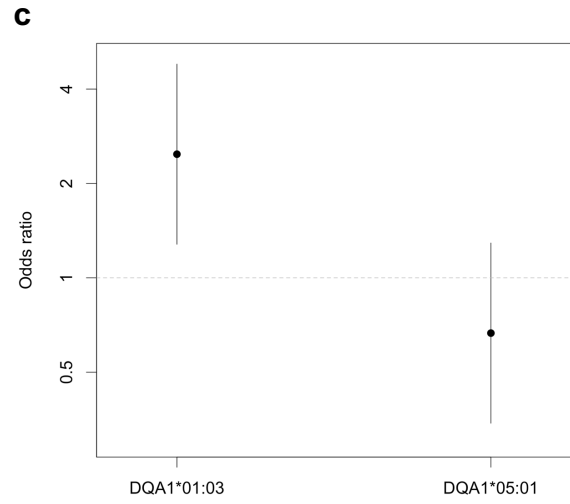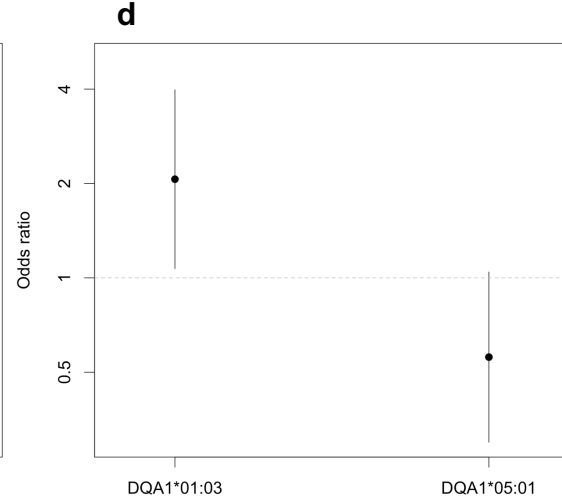

**Supplementary Figure 2: Effect size estimates for *HLA-DQA1\*01:03* using alternative analytical approaches.** Effect size estimates with confidence intervals are plotted for *HLA-DQA1\*01:03* and *HLA-DQA1\*05:01* based on a model including parameters for both alleles and sex using **(a)** a linear mixed-model with transformation<sup>36</sup>, **(b)** logistic regression with no additional parameters, **(c)** logistic regression with parameters for the first ten principal components<sup>10</sup>, and **(d)** a generalized linear mixed-model<sup>11</sup>.

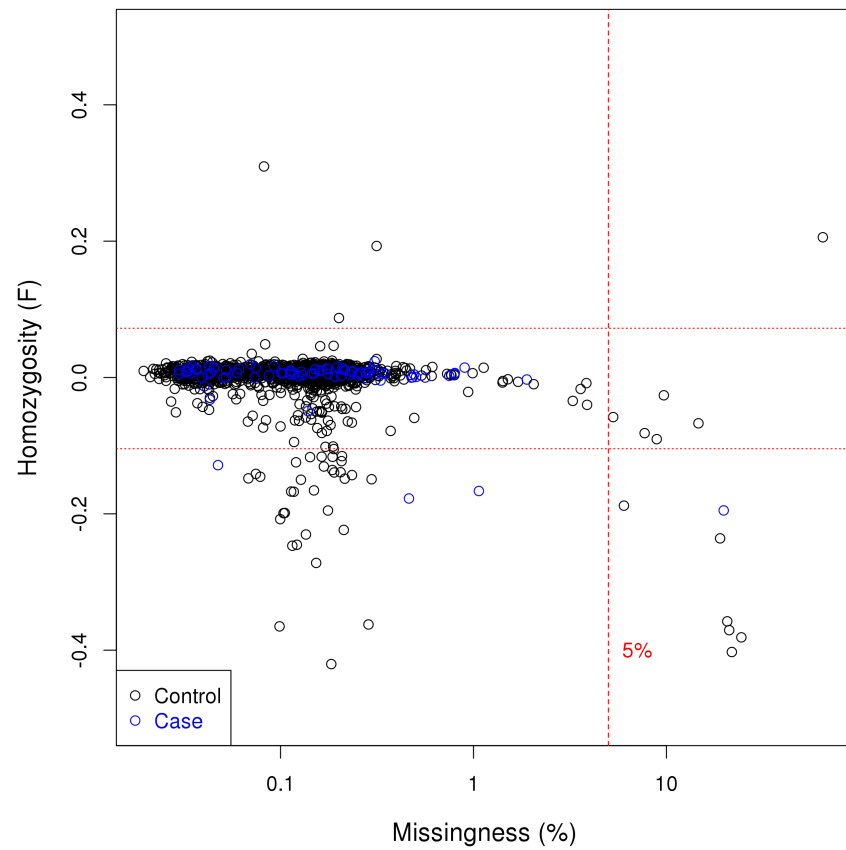

**Supplementary Figure 3: Assessment of heterogeneity and missingness in the study.** Autosomal homozygosity is plotted against missingness on a logarithmic scale. Horizontal lines are drawn at two standard deviations above and three below the mean of autosomal homozygosity with missingness less than 5%.



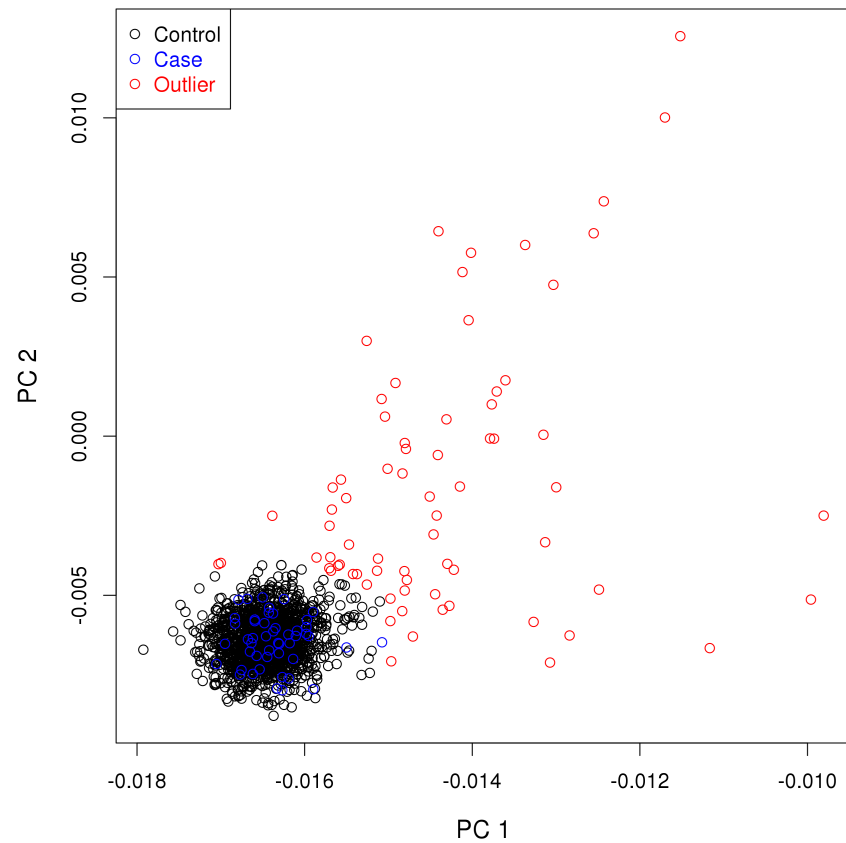

**Supplementary Figure 4: Principal component analysis of ancestry to definite European ancestry.** Principal components analysis was run with individuals of African and East Asian ancestry from the HapMap consortium data and outlying samples removed based on distance from the British European cluster.

**a**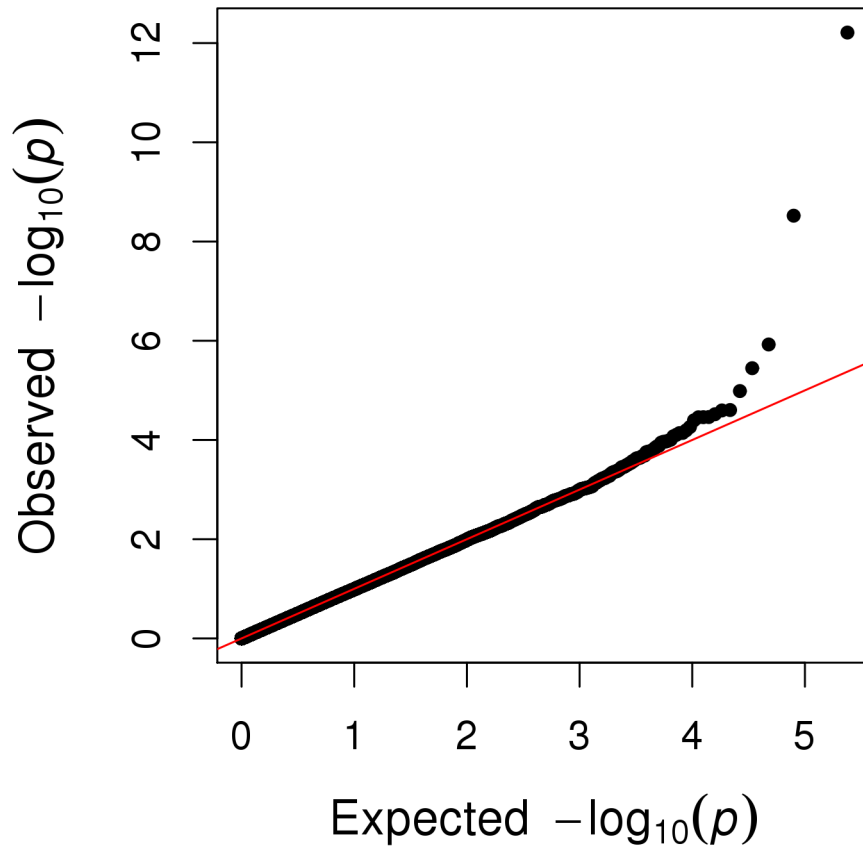**b**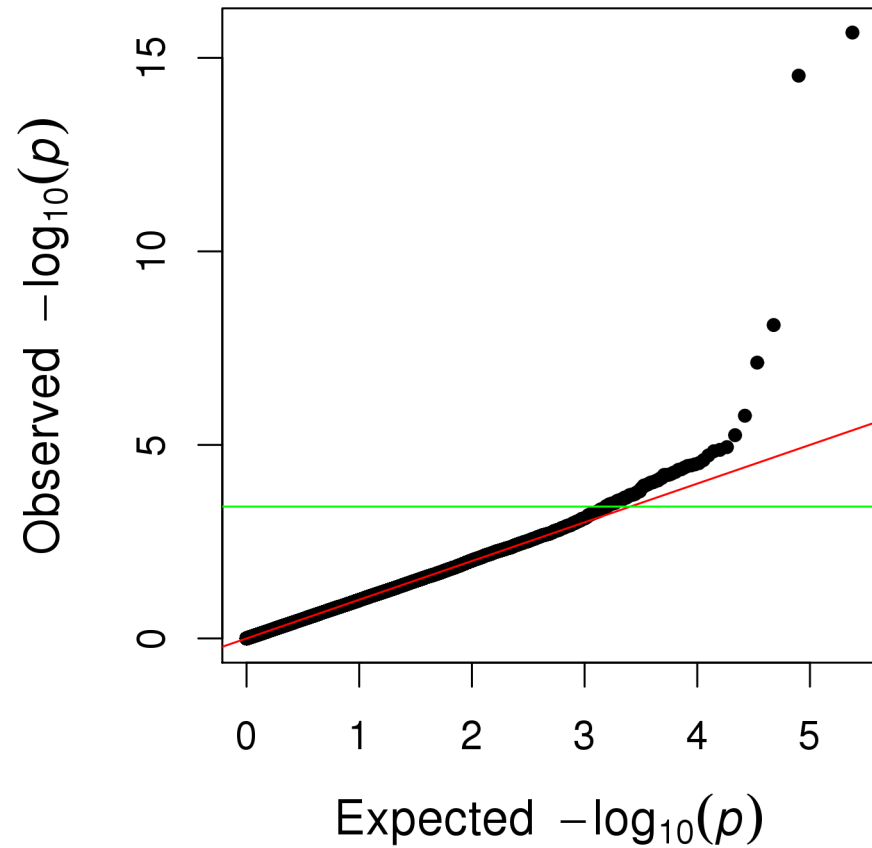

**Supplementary Figure 5: Removal of variants by the two locus quality control test.** Quantile-quantile plots are shown for genome-wide susceptibility analysis performed with **(a)** unadjusted linear regression and **(b)** the genome-wide linear model-based quality control test. In the latter, the horizontal green line is drawn at the point at which the negative common logarithm of the observed  $P$ -value exceeds the expected value by greater than 0.2 (based on Lee *et al.*<sup>32</sup>). Variants were excluded when the test statistic calculated in both directions exceeded this threshold.
